# Supplementary material
Source: PubMed Central journal article supplement (PMC6214777)

# Figure S1

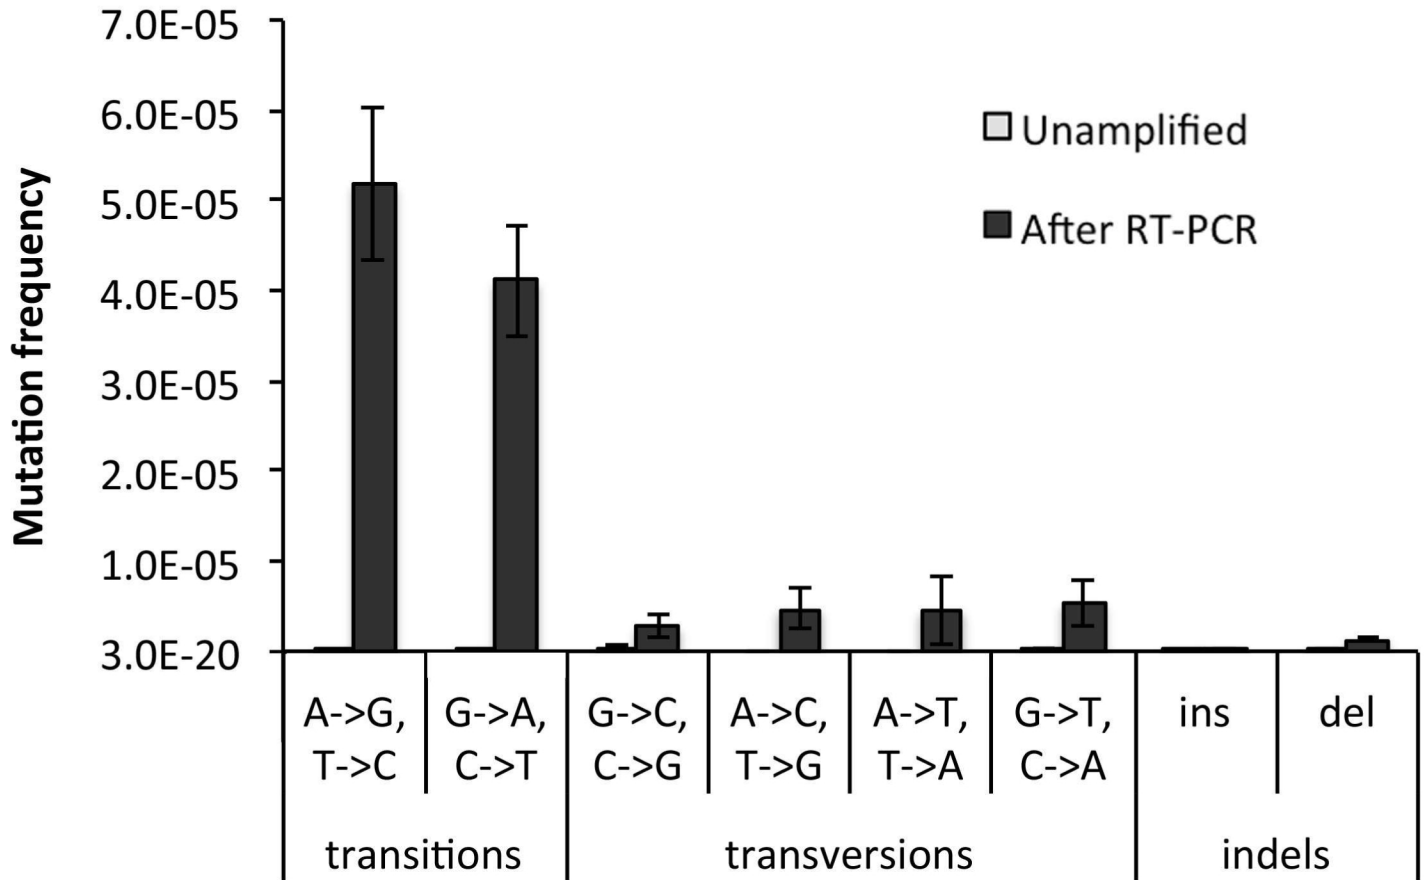

# Figure S2

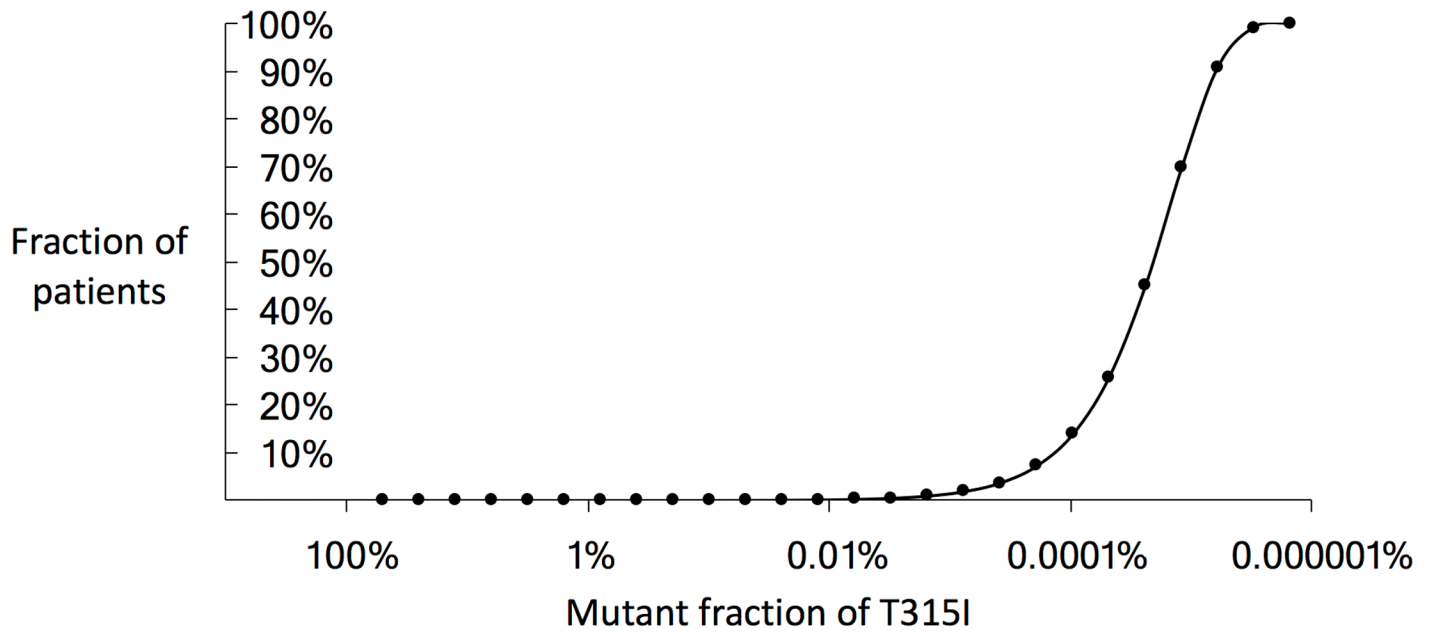

# Figure S3

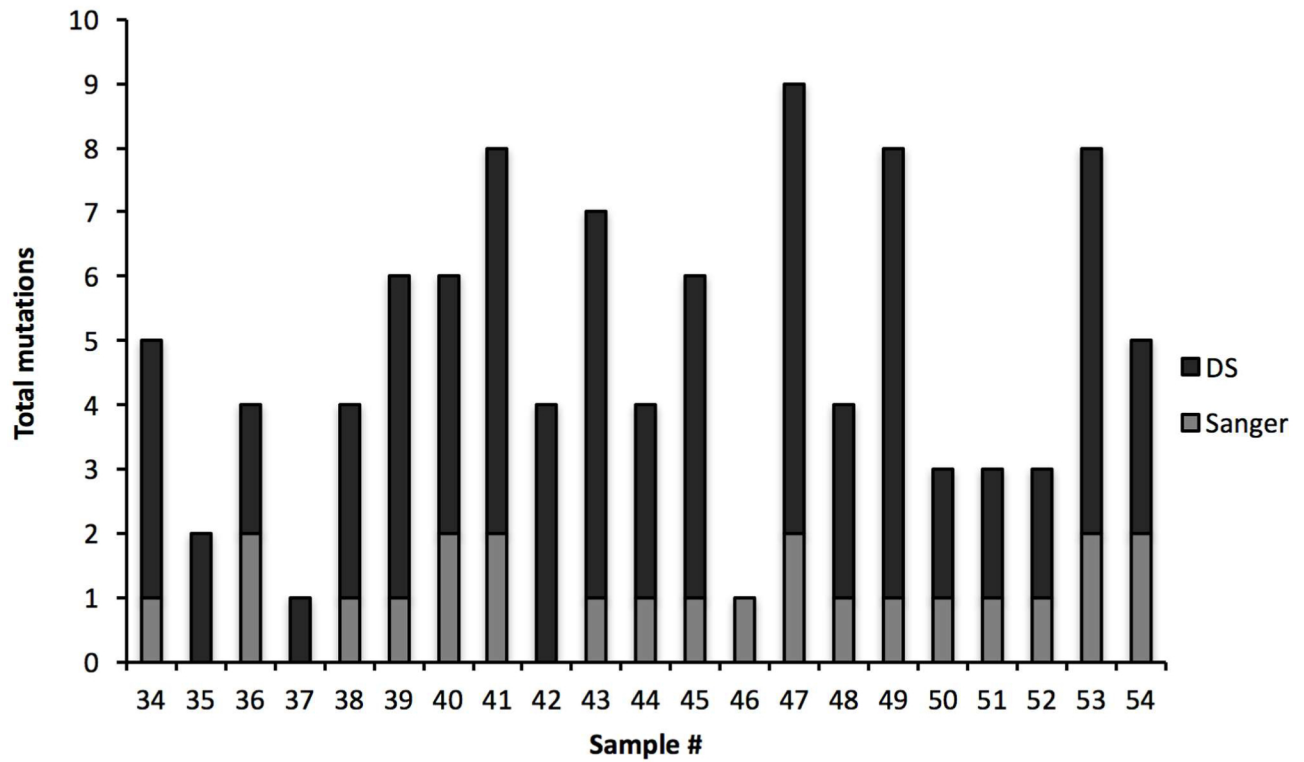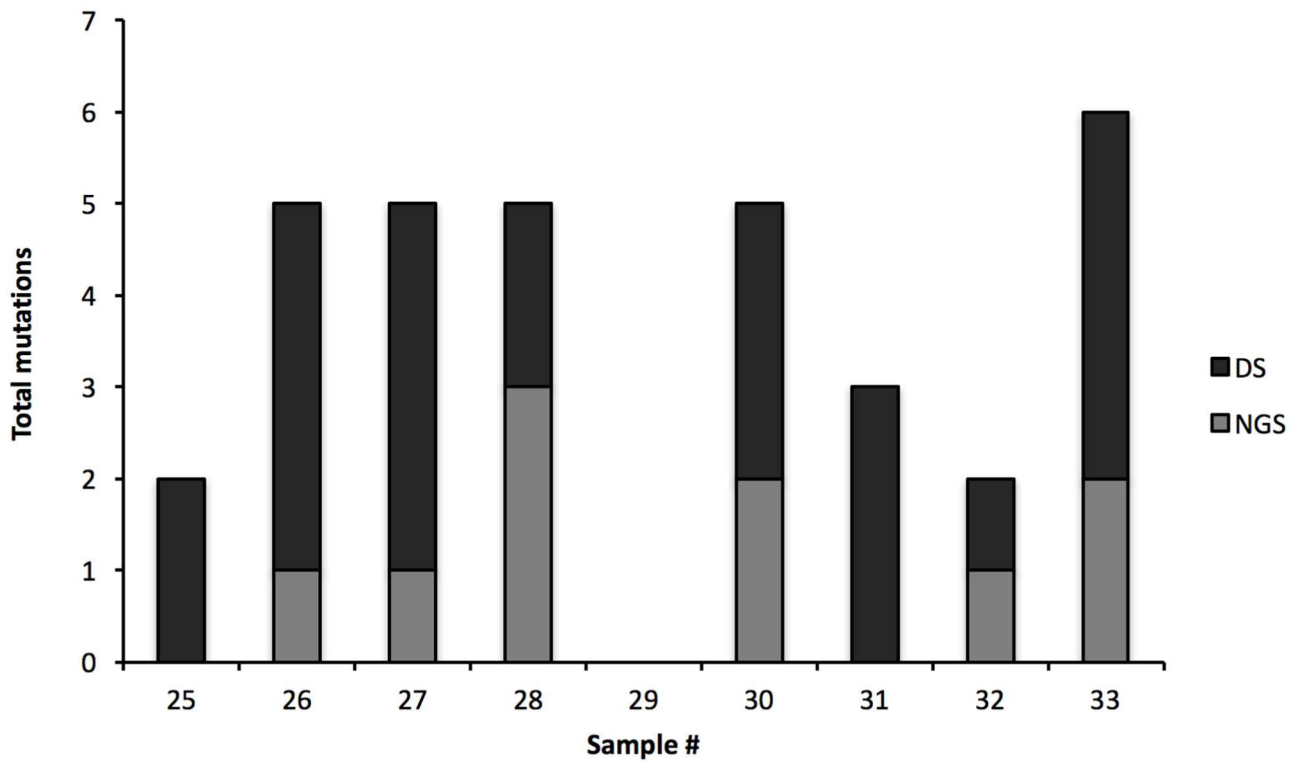

# Figure S4

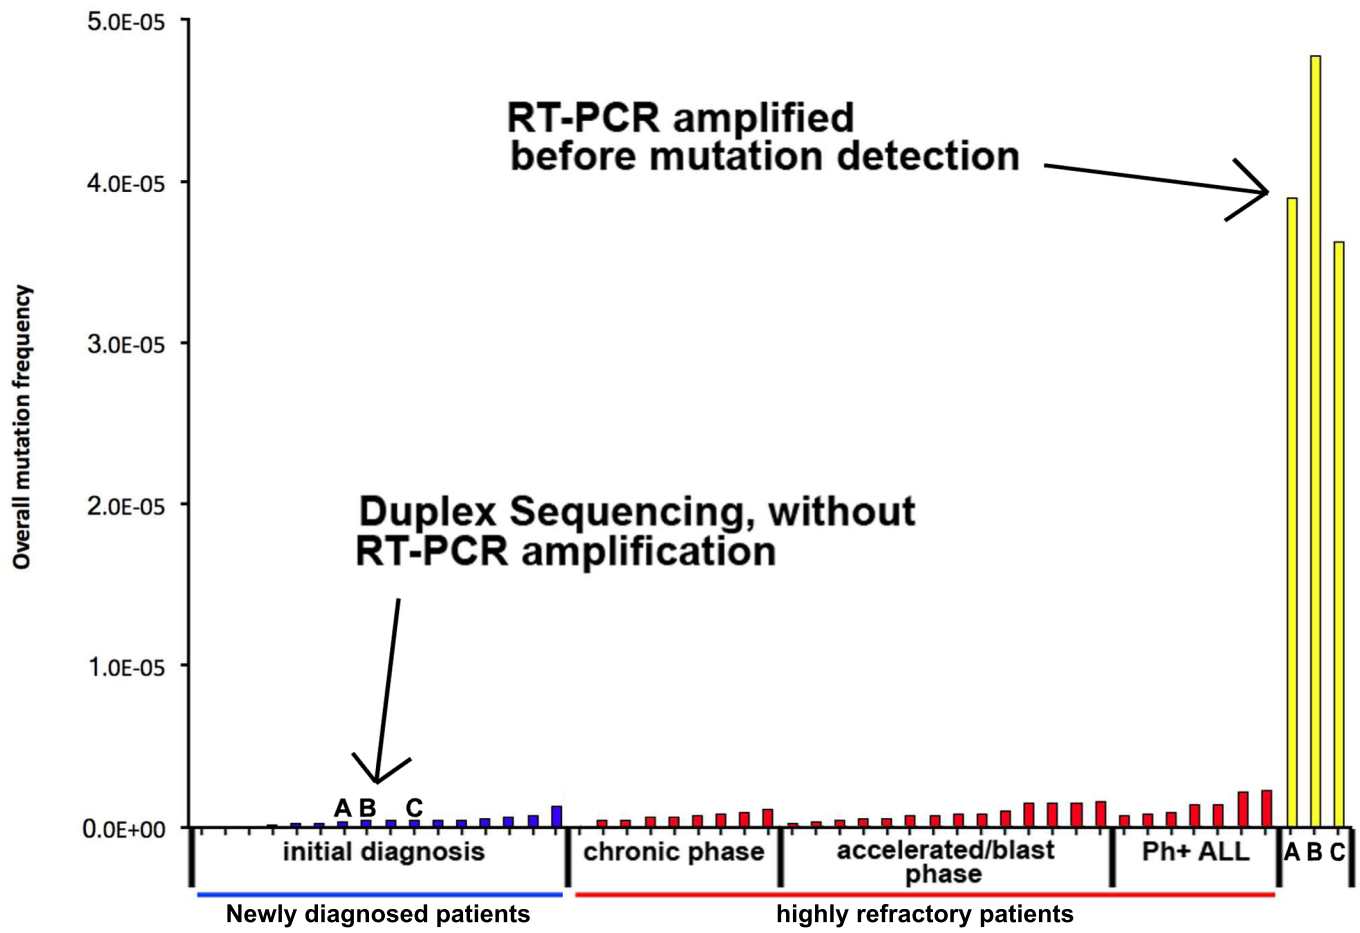

# Figure S5

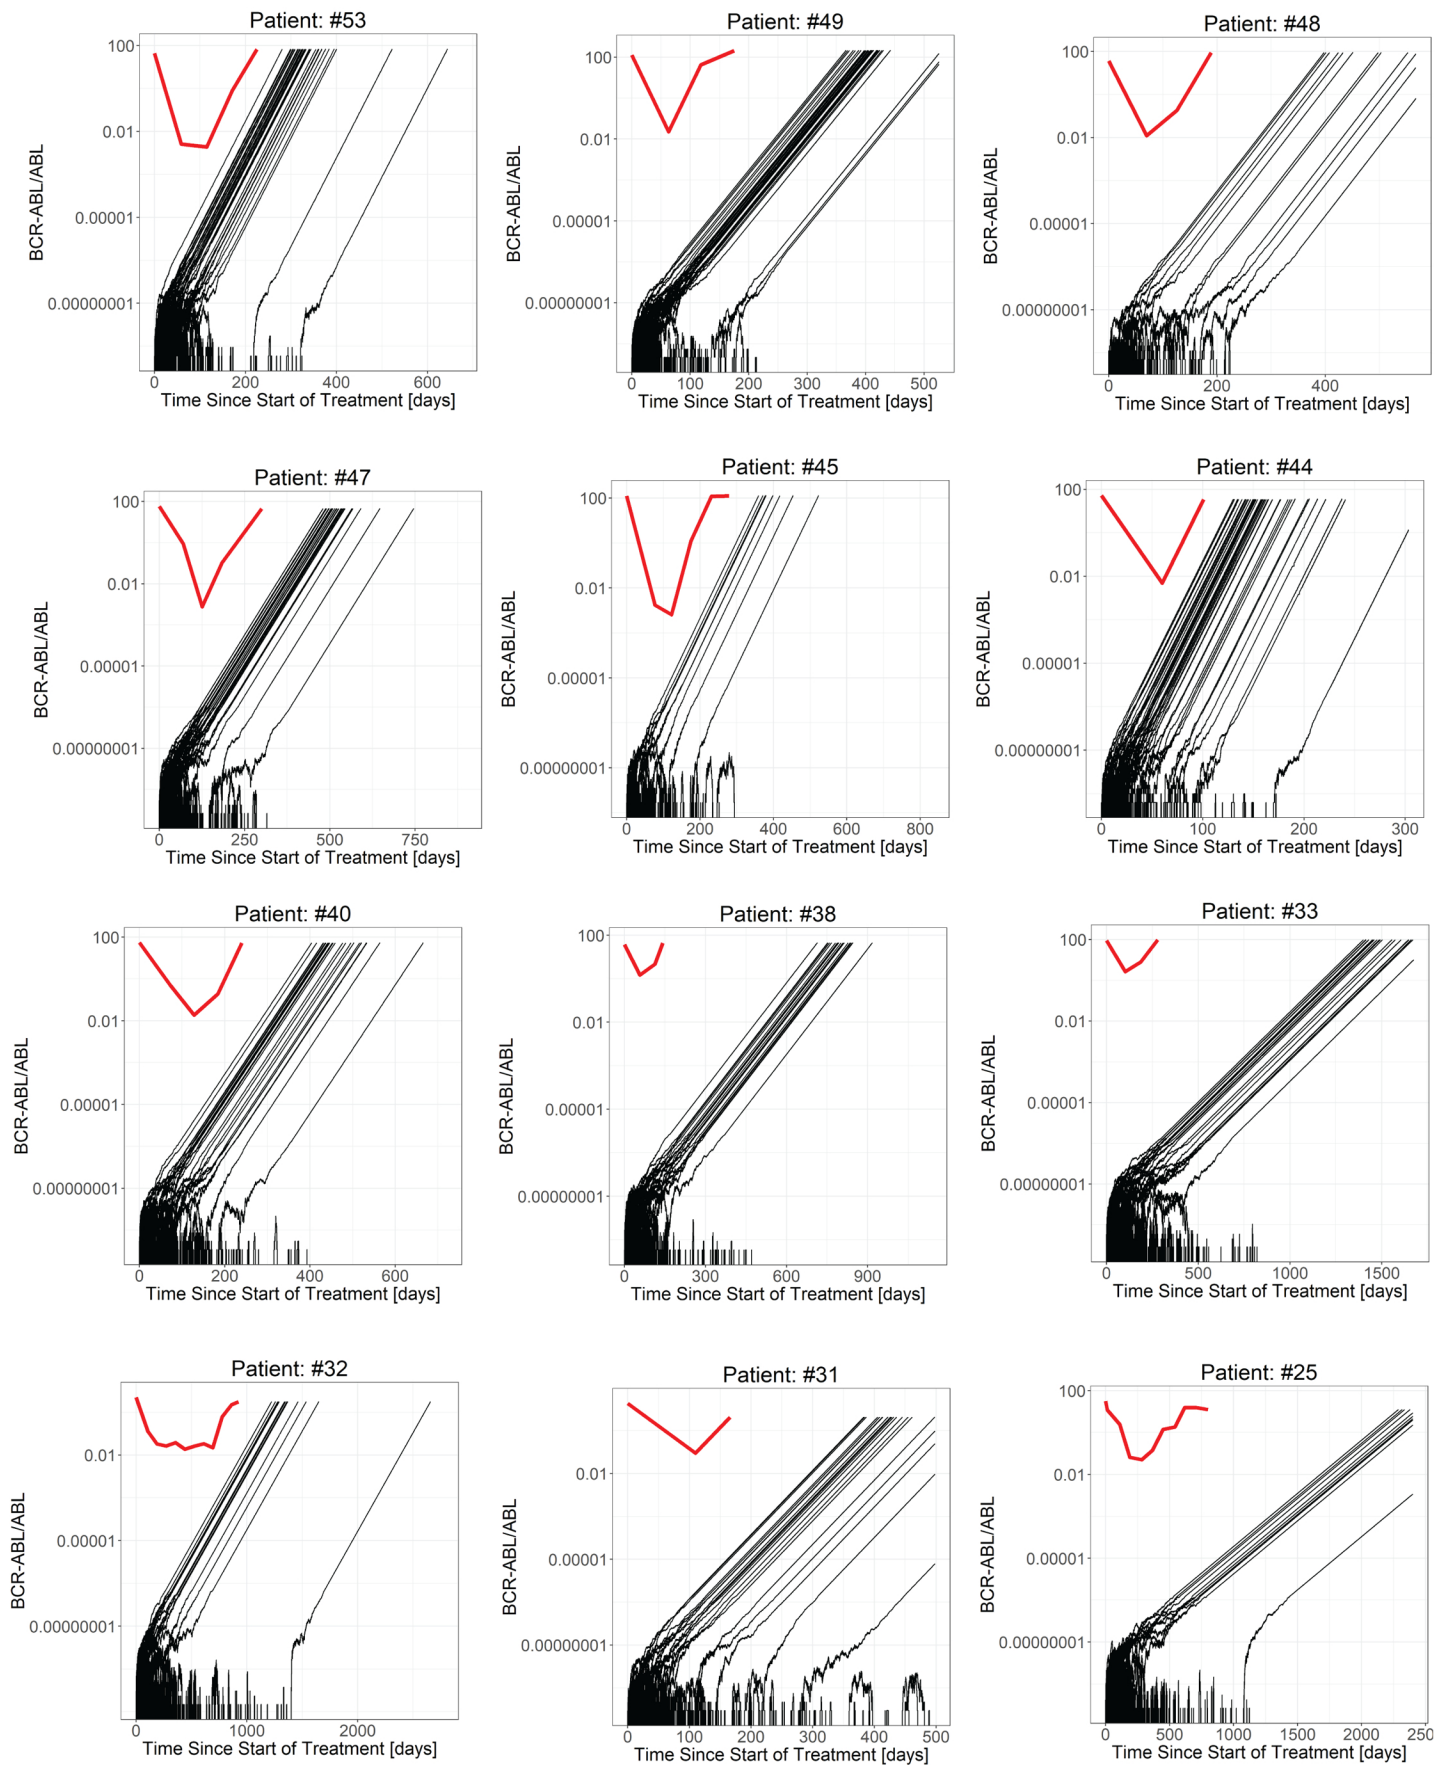

# Figure S6

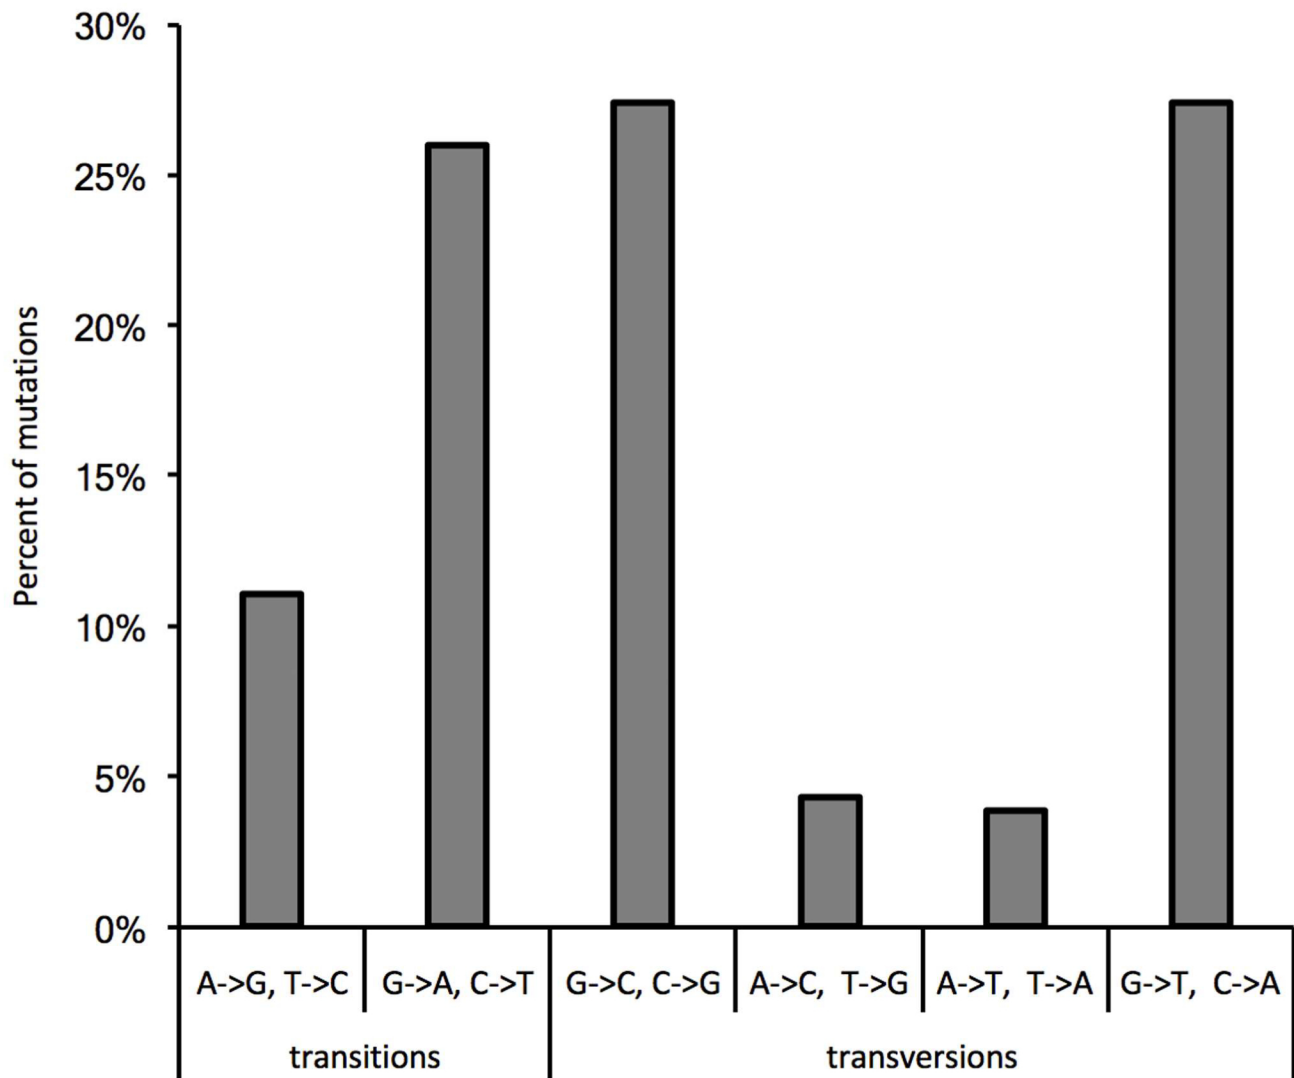

# Figure S7

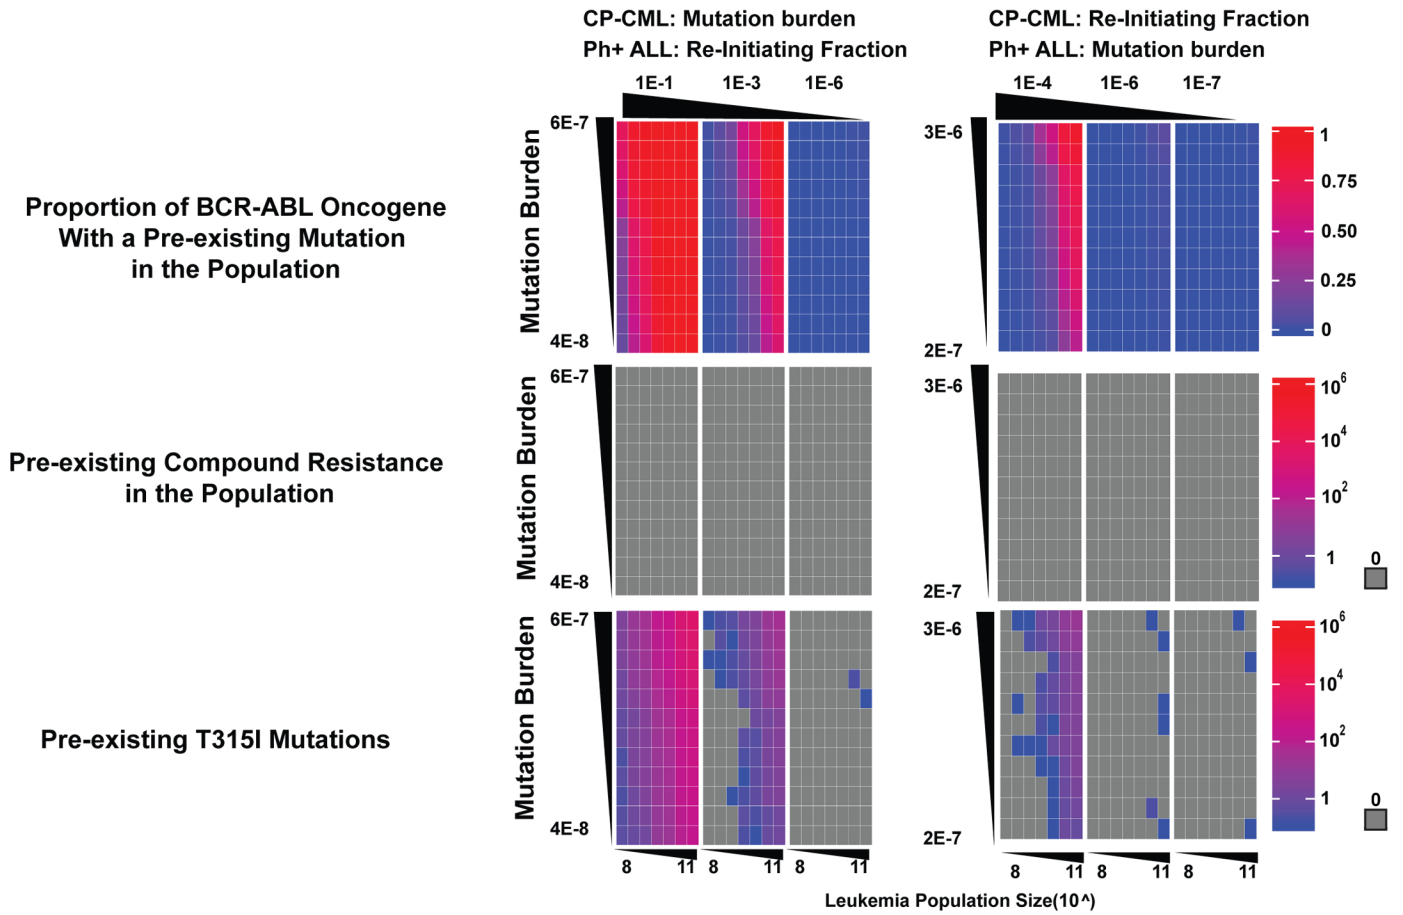

Supplement: NIHMS1500907-supplement-3.pdf [file NIHMS1500907-supplement-3.pdf]
